# Supplementary material for: Attenuation of skin injury by a MARCO targeting PLGA nanoparticle
Source: PubMed Central journal article supplement (PMC11621362; doi:10.1038/s41536-024-00381-z), 2024-12-06
Supplement: 41536_2024_381_MOESM1_ESM.pdf [file 41536_2024_381_MOESM1_ESM.pdf]

1

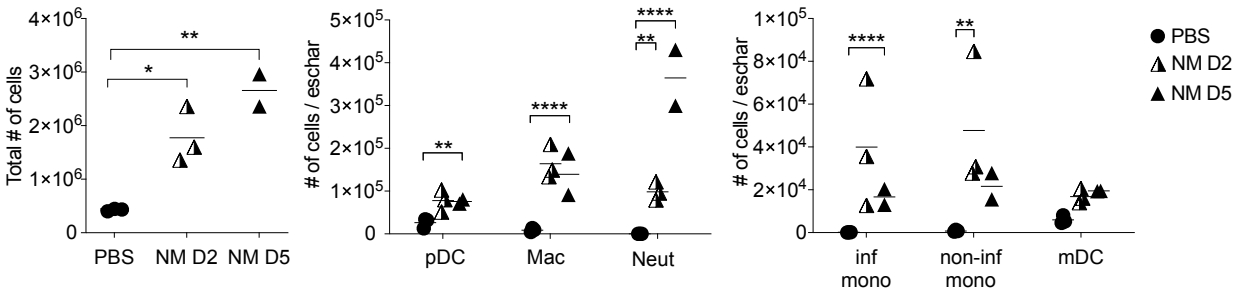

2

3 **Supplementary Figure 1.** Time course study showing the immune infiltration on day 2 and day 5

4 collected skin. The graphs show the significant infiltrate increase on skin, collected 2 days post

5 NM insult. \* $p < 0.05$ , \*\* $p < 0.01$ , \*\*\* $p < 0.001$ , \*\*\*\* $p < 0.0001$

6

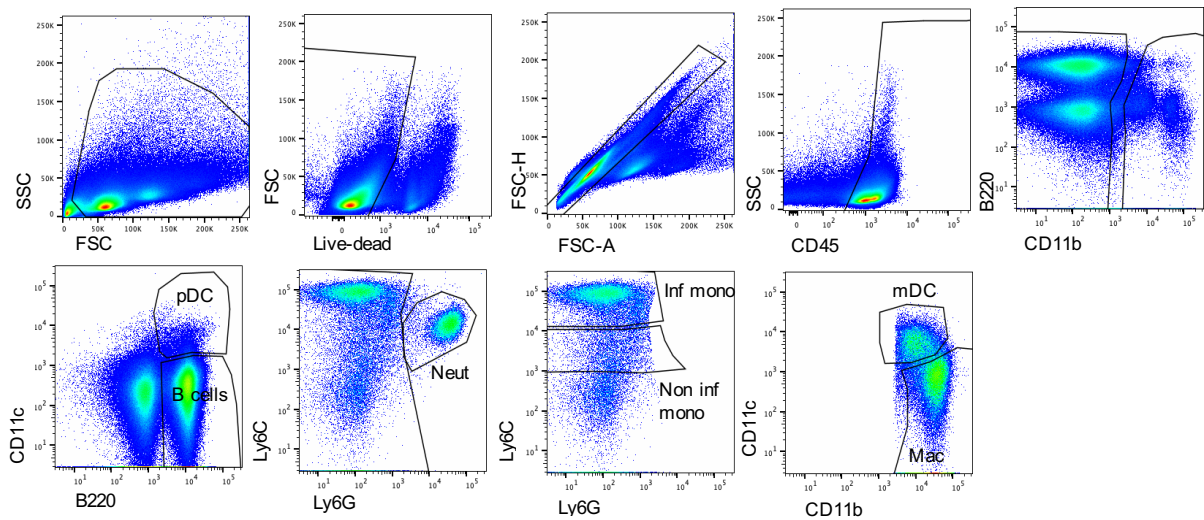

7

8 **Supplementary Figure 2. Gating strategy for APC subsets.** A NM+PLG mouse spleen sample

9 is shown as a representative to demonstrate the sequential gating strategy used to discriminate

10 neutrophils (Neut) ( $LD^-/CD45^+/CD11b^+/B220^-/Ly6G^+/Ly6C^{int}$ ), B cells ( $LD^-/CD45^+/CD11b^-$

11  $/B220^+/CF11c^-$ ), plasmacytoid DC (pDC) ( $LD^-/CD45^+/CD11b^-/B220^+/CD11c^+$ ), myeloid DC

12 (mDC) ( $LD^-/CD45^+/CD11b^{int}/B220^-/Ly6G^-/Ly6C^{low-int}/CD11c^+$ ), inflammatory monocytes ( $LD^-$

13  $/CD45^+/CD11b^+/B220^-/CD11c^-/Ly6G^-/Ly6C^{hi}$ ), and non-inflammatory monocytes ( $LD^-$

14 /CD45<sup>+</sup>/CD11b<sup>+</sup>/B220<sup>-</sup>/CD11c<sup>-</sup>/Ly6G<sup>-</sup>/Ly6C<sup>int</sup>). FSC, forward scatter; SSC, side scatter; FSC-H,  
 15 forward scatter height; FSC-A, forward scatter area; DC; dendritic cells.

16  
 17  
 18

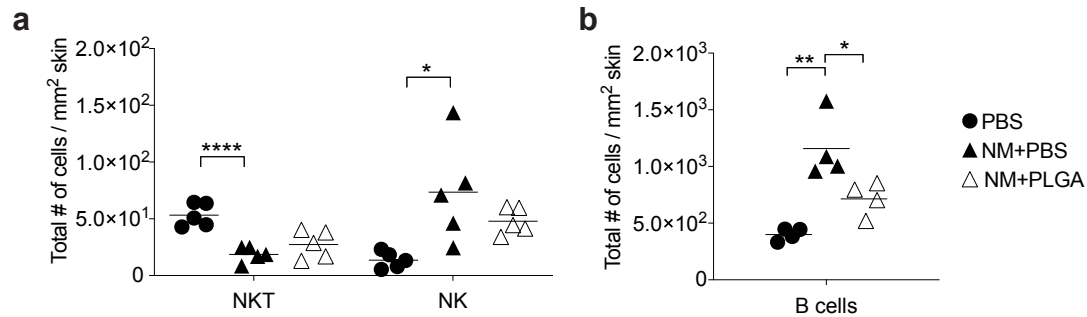

19  
 20 **Supplementary Figure 3.** Significant modulation of natural killer cells (a) and B lymphocytes (b)  
 21 in NM-induced skin lesions following PLGA nanoparticle treatment. \*p<0.05, \*\*p<0.01,  
 22 \*\*\*p<0.001, \*\*\*\*p<0.0001

23  
 24

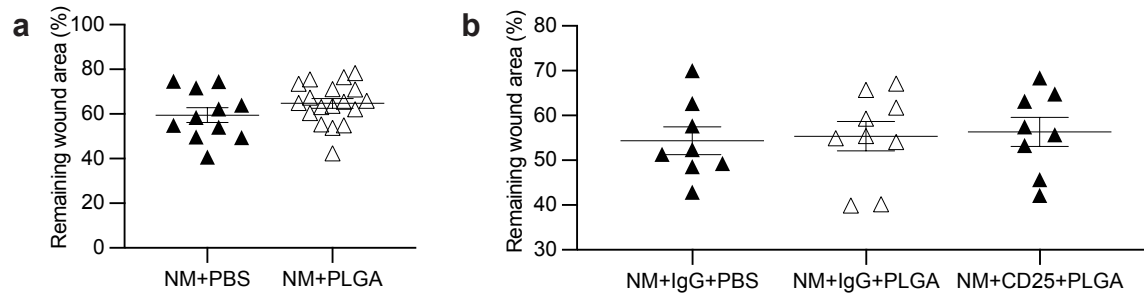

25  
 26  
 27 **Supplementary Figure 4.** Remaining wound area measurements on day 3 post NM injury.  
 28 For proper comparison purposes we included in Panel a, the measurements from Day3 wounds  
 29 of mice from Fig. 1c. Panel b shows the measurements of remaining day3 wounds from CD25  
 30 depletion experiments. No statistical significance is observed.
